1 **TITLE:**  
2 Onion thrips *Thrips tabaci* [Thysanoptera: Thripidae] reduces yields and THC in indoor grown  
3 cannabis

4 **IDENTIFICATION OF AUTHORS:**  
5 Frédéric McCune<sup>1</sup>, Chad Murphy<sup>2</sup>, James Eaves<sup>3</sup>, and Valérie Fournier<sup>1</sup>

---

<sup>1</sup> Centre de recherche et d'innovation sur les végétaux, Université Laval, Québec, QC, Canada G1V 0A6; corresponding author: frederic.mccune.1@ulaval.ca.

<sup>2</sup> GreenSeal Cannabis Co., Stratford, ON, Canada N4Z 1H3

<sup>3</sup> Département de management/ Department of Management, FSA ULaval – Faculté des sciences de l'administration, Université Laval, Québec, QC, Canada G1V 0A6

6

## ABSTRACT

7 Cannabis (*Cannabis sativa* L. [Rosales: Cannabaceae]) is a newly legalized crop and requires  
8 deeper insights on its pest communities. In this preliminary study, we identified a thrips species  
9 affecting indoor grown cannabis in Canada and tested its impact on plant yield. We used three  
10 levels of initial infestation (zero, one, and five thrips) on individual plants grown in two growing  
11 mediums: normal substrate or substrate containing the biostimulant *Bacillus pumilus*, Meyer and  
12 Gottheil [Bacillales: Bacillaceae]. We found that the onion thrips, *Thrips tabaci* (Lindeman)  
13 [Thysanoptera: Thripidae] is proliferating in indoor grown cannabis. Furthermore, our results  
14 showed that fresh yields were higher for the plants that initially received zero thrips compared to  
15 those that initially received five thrips. Moreover, the biostimulant did not help reduce the impact  
16 of thrips. We highlight the importance for growers to carefully monitor thrips infestations in indoor  
17 grown cannabis. Finally, we emphasize the need for more research related to the impact of pests  
18 on cannabis yields and safe means of pest control for this strictly regulated crop.

19 **RÉSUMÉ**

20 Le cannabis (*Cannabis sativa* L. [Rosales: Cannabaceae]) est une culture nouvellement légalisée

21 et qui requiert des connaissances approfondies sur ses ravageurs. Dans cette étude préliminaire,

22 nous avons identifié une espèce de thrips affectant le cannabis cultivé à l'intérieur au Canada et

23 testé son impact sur le rendement des plants. Nous avons testé trois niveaux initiaux d'infestation

24 (zéro, un, et cinq thrips) sur des plants individuels cultivés dans deux terreaux : un substrat normal

25 ou un substrat contenant le biostimulant *Bacillus pumilus*, Meyer and Gottheil [Bacillales:

26 Bacillaceae]. Nous avons observé que le thrips de l'oignon, *Thrips tabaci* (Lindeman)

27 [Thysanoptera: Thripidae] prolifère dans le cannabis cultivé à l'intérieur. Nos résultats montrent

28 que le rendement des plants de cannabis est plus élevé pour les plants n'ayant pas reçu de thrips

29 comparativement aux plants sur lesquels cinq thrips ont initialement été inoculés. De plus, le

30 biostimulant n'a pas permis de réduire l'impact des thrips. Nous mettons en lumière l'importance

31 pour les producteurs de cannabis cultivé à l'intérieur de faire un suivi rigoureux de leurs

32 populations de thrips. Finalement, nous soulignons les besoins importants en recherches concernant

33 les ravageurs du cannabis, leurs impacts et le développement de méthodes de lutte dans cette culture

34 hautement règlementée.

35 **INTRODUCTION**

36 Cannabis (*Cannabis sativa* L. [Rosales: Cannabaceae]) was legalized for recreational purposes in  
37 October 2018 in Canada and is still under strict prohibition in most of the world. Thus, there is a  
38 severe lack of information regarding its growing practices (Eaves, Eaves, Morphy, & Murray,  
39 2020; Wilson et al., 2019). This includes research related to the impact of pest species and the  
40 means of controlling them (Cranshaw et al., 2019). Under the Cannabis Regulations and the Pest  
41 Control Products Act, Health Canada only allows cannabis growers to use a limited number of  
42 pesticide products. Consequently, companies rely mostly on biological control, but these  
43 techniques are very costly, increase the risk of contaminating the final product with dead insect  
44 parts, and yield uneven results.

45 More than 300 arthropod species have been identified on hemp and cannabis (Cranshaw et al.,  
46 2019; McPartland, 1996a). On cannabis, the most predominant ones are sap-sucking arthropods  
47 such as aphids, whiteflies, leafhoppers, mealybugs and various mites (Lago & Stanford, 1989;  
48 McPartland, 1996a; Wilson et al., 2019). Recent reports of potential pests in cannabis include the  
49 marmorated stink bug (*Halyomorpha halys*) (Britt, Pagani, & Kuhar, 2019) and two aphid species  
50 (*Phorodon cannabis* and *Rhopalosiphum rufiabdominale*) (Lagos-Kutz, Potter, DiFonzo, Russell,  
51 & Hartman, 2018). Despite this, it is believed that very few insects can actually cause significant  
52 losses in commercial cannabis production (Dewey, 1913; McPartland, 1996a). In a recent survey,  
53 growers from California reported from zero to over 25% crop damage caused by arthropods  
54 (Wilson et al., 2019). Nonetheless, a large proportion of cannabis production occurs indoor or in  
55 greenhouses, which provide environments that are particularly favourable for pests. In fact, in  
56 Canada, Health Canada only started licensing outdoor area in October of 2019. Since most

57 published studies have focused on outdoor production, our current estimates of pest-risk posed to  
58 cannabis producers may greatly underestimate the actual risk.

59 Thrips have been shown to be a major pest for many crops, most notably in greenhouses (Stuart,  
60 Gao, & Lei, 2011) and can inflict both direct and indirect damage (Hao, Shipp, Wang,  
61 Papadopoulos, & Binns, 2002; Pereira et al., 2017). Damage resulting from sucking or ovipositing  
62 in the marketable plant parts, like fruits, correspond to direct damage (Shipp, Hao, Papadopoulos,  
63 & Binns, 1998), while damage caused on non-marketable plant parts, like leaves, are considered  
64 indirect damage (Diaz-Montano, Fuchs, Nault, Fail, & Shelton, 2011; German, Ullman, & Moyer,  
65 1992). Thrips are found in indoor cannabis facilities (McPartland, 1996a) but we are not aware of  
66 any studies investigating their impact on cannabis yields. Nevertheless, Cranshaw et al. (2019)  
67 reports that thrips are common pests in hemp farms. For instance, Onion thrips, *Thrips tabaci*  
68 (Lindeman) [Thysanoptera: Thripidae] have been frequently found on hemp in Colorado and can  
69 cause important foliage damage on indoor grown plants (Cranshaw et al., 2019). Western flower  
70 thrips, *Frankliniella occidentalis* (Pergande), tobacco thrips, *Frankliniella fusca* (Hinds) and  
71 greenhouse thrips, *Heliethrips haemorrhoidalis* (Bouché) have also been found in hemp farms  
72 (Cranshaw et al., 2019; Lago & Stanford, 1989; McPartland, 1996a).

73 Biostimulants are biological products that improve the productivity of plants. These products  
74 are often a mixture of compounds derived from various organisms, such as bacteria, fungi, algae,  
75 higher plants or animals, and frequently possess unexplained modes of action (Calvo, Nelson, &  
76 Kloepper, 2014; Conant, Walsh, Walsh, Bell, & Wallenstein, 2017; Yakhin, Lubyantsev, Yakhin, &  
77 Brown, 2017). Specifically, the bacterium *Bacillus pumilus*, Meyer and Gottheil, [Bacillales:  
78 Bacillaceae] is known for its growth promoting (de-Bashan, Hernandez, Bashan, & Maier, 2010;

79 Gutiérrez-Mañero et al., 2001; Probanza, Lucas, Acero, & Gutierrez Mañero, 1996) and antifungal  
80 (Pérez-García, Romero, & de Vicente, 2011) properties. Furthermore, *B. pumilus* successfully  
81 suppressed larvae of *Scirpophaga incertulas* and *Bruchus dentipes* in laboratory conditions  
82 (Rishad, Rebello, Shabanamol, & Jisha, 2017; Tozlu, Dadasoglu, Kotan, & Tozlu, 2011). These  
83 results are likely explained by its high production of chitinase, an enzyme that can degrade the  
84 chitin containing cell walls of insects and thus induce death (Rishad et al., 2017). Chitinase has  
85 shown insecticidal properties against weevils (Laribi-Habchi, 2014) and aphids (Kim & Je, 2010).  
86 Growing mediums enhanced with entomopathogenic bacteria represents a promising avenue  
87 toward pest control and reduced use of pesticides. When added to a growing medium, *B. pumilus*  
88 reduces the infestation level of fungus gnats (Diptera) in greenhouses, but shows inconclusive  
89 results for the western flower thrips (Gravel & Naasz, 2019).

90 Hence, the objectives of this preliminary study were to identify the thrips species affecting  
91 indoor cannabis production in Ontario, to determine the potential yield and quality losses associated  
92 with their infestations, and, finally, to evaluate the impact of adding the biostimulant *B. pumilus* to  
93 the growing substrate on the impacts of thrips.

## 94 MATERIALS AND METHODS

### 95 Experiment

96 The experiment was conducted in the autumn of 2019 in the commercial cannabis production  
97 facility of GreenSeal Cannabis Company located in Stratford, Ontario, Canada. We used 60 clones  
98 (approximately two weeks old) of cannabis (*C. sativa* var. Green Crack) to test the impact of three  
99 initial levels of thrips infestation (zero, one or five thrips) and two growing substrates (normal or  
100 biostimulant). Ten cannabis clones, acting as ten replicas, were randomly assigned to each

101 combination of infestation level and growing substrate. All clones were planted in seven inches  
102 square pots (4L) using one of the two types of substrate. The first (“normal substrate”) was a  
103 fibrous, peat-moss substrate with perlite (Pro-Mix HP Mycorrhizae, Premier Tech). The second  
104 (“biostimulant substrate”) was the normal substrate with the addition of the biostimulant *Bacillus*  
105 *pumilus* (strain GHA180) (Pro-Mix HP Biostimulant + Mycorrhizae, Premier Tech). Plants were  
106 propagated in a quarantine room and we visually inspected them for predatory mite or thrips. As  
107 an additional precaution, we carefully used a spray-bottle and cloth to wipe each individual leaf to  
108 ensure no arthropods were on them.

109 As thrips can reproduce asexually (Morison, 1957; Stuart et al., 2011) inoculating a single  
110 immature thrips can lead to an significant population overtime. It is thus not possible to control for  
111 their final infestation levels. Even though we do not think that controlling the initial infestation  
112 levels will result in consistent levels of infestation at the end of the experiment, we consider that it  
113 provides a valuable insight about the impact of a pest (Torres-Vila, Rodríguez-Molina, & Lacasa-  
114 Plasencia, 2003). In this way, we inoculated the plants with zero, one and five thrips to represent  
115 respectively control, low and high levels of infestation (Hao et al., 2002). Thrips used for the  
116 experiment were collected directly from the production area of the facility with entomological  
117 mouth aspirators. We targeted what we believed to be late instar larvae. Thrips were carefully  
118 inoculated on each plant with fine brushes. All plants, including the controls with no inoculated  
119 thrips, were then covered with Nitex (150 µm mesh) bags that were supported by stainless-steel  
120 frames and tightly secured around the pots by elastics bands. The fine meshes of the Nitex bags  
121 help prevent thrips from escaping and non-experimental pests or predatory mites from entering.  
122 Nonetheless, since this experiment was conducted in a production facility, rather than inside a  
123 university lab (It is still very difficult to receive a cannabis research license in Canada.), we did

124 expect some cross contamination and thus recorded leaf damage for all plants. Two drippers were  
125 threaded under the elastic bands for irrigation purpose. We considered monitoring the thrips levels  
126 over the course of the experiment but decided the risk of allow arthropodes to enter or escape was  
127 too high.

128 The plants were grown in the facility's quarantine room, where all plants were placed on two-  
129 levels shelves. Five plants of each treatment were placed on each level of the shelves following a  
130 completely randomized design, so that 30 plants were located on the top level and 30 plants on the  
131 bottom level. Plants were placed in two rows of 15 plants on each level. Shelves were equipped  
132 with broad-spectrum LED lighting (Voltserver High-Intensity Lighting Platform). Light intensity  
133 was gradually increased each week from 25% intensity (average of around 500 PPF) to a  
134 maximum of 50% intensity (average of around 1,080 PPF). Plants were then kept under  
135 commercial cultivation conditions (day/night temperature of 25°C/21°C +/- 2, 12 hours of daylight,  
136 50% +/- 5 RH, and CO<sub>2</sub> at ambient levels). Using a short vegetative period combined with these  
137 environmental conditions are typical for growers who follow a "sea of green" growing strategy, as  
138 GreenSeal Cannabis does. The exception is CO<sub>2</sub> concentration levels, which were maintained at  
139 ambient levels for the experiment. Plants were watered by drip irrigation about every two days  
140 with approximately 1 L of water/plant.

141 All 60 plants were grown in the cages under aforementioned conditions for eight weeks. At the  
142 end of the eight-week period, the plants had reached the end of the flower stage. The fresh  
143 inflorescences were then harvested following normal commercial methods and weighed for each  
144 plant (Pennsylvania 7600 Series Bench Scale 4536 g x 0.5 g). In order to measure total THC levels,  
145 we took flower samples from three plants from each treatment with zero or five thrips. The samples



146 for each treatment were then blended together and analyzed using HPLC analysis conducted by  
147 A&L Canada Laboratories Inc. located in London, Ontario. We therefore obtained a single THC  
148 measure for each control and high infestation treatment.

149 Multiple rows of plants in the two production rooms of the cannabis facility were checked to  
150 collect and identify all thrips species occurring in the facility. All collected specimens were  
151 observed under a stereomicroscope and appeared to be similar. Multiple thrips specimens at both  
152 adult and larval stages were collected and sent to the expert insects taxonomist from the Laboratoire  
153 d'expertise et de diagnostic en phytoprotection (LEDP) of the Ministère de l'Agriculture, des  
154 Pêcheries et de l'Alimentation du Québec for identification (Palmer, Mound, Du Heaume, & Betts,  
155 1989), who has stored the vouchers. No other pests than thrips were observed in the facility.

### 156 **Statistical analyses**

157 Fresh yield data were analyzed with R (R Core Team, 2019). We used generalized least squares  
158 fitted linear models and linear mixed-effects models (package “nlme” (Pinheiro, Bates, DebRoy,  
159 Sarkar, & R Core Team, 2019)). Fresh yield was used as the response variable, while both the  
160 number of thrips initially inoculated and the substrate type were explanatory variables. All models  
161 included all interactions between our explanatory variables. We first computed generalized least  
162 squares fitted linear models and then compared these to linear mixed-effects models in which the  
163 shelves' level (upper or lower) was treated as a random effect. This allows us to take into account  
164 a potential difference in temperature or growing conditions between levels. We thereafter  
165 compared both types of models based on their Akaike information criterion (AIC). The more  
166 complex linear mixed-effects models including the shelves' level had a higher AIC than the more  
167 simple models, indicating less accuracy of the model. We therefore only present results from the  
168 generalized least squares fitted linear models in the result section. We used an ANOVA to test the

169 effect of both the number of inoculated thrips and the type of substrate on the fresh yield. We  
170 changed the reference level and fitted models once more to evaluate the effect of the multiple levels  
171 of our explanatory variables that were identified as significant in the ANOVA.

## 172 RESULTS

173 All thrips specimens collected in the GreenSeal Cannabis Company's facility were identified as  
174 being onion thrips, *Thrips tabaci* (Lindeman). The final fresh yield of our individual plants varied  
175 between 36.81 g and 195.84 g. Three plants died at the start of the experiment from transplant  
176 shock. We did not have replacement plants. They were respectively under treatments zero thrips-  
177 biostimulant, one thrips-normal, and five thrips-normal. Five others grew far more slowly than the  
178 average plant, which may indicate they were somehow stunted. Those were respectively under  
179 treatments zero thrips-biostimulant, zero thrips-normal (two plants), one thrips-biostimulant, and  
180 one thrips-normal. The plants that died or had a reduced growth were thus represented in almost  
181 all treatments, but slightly more in controls and low infestation treatments. Nonetheless, a boxplot  
182 revealed that only three of these observations were actual outliers. We removed the dead plants  
183 from our dataset and performed all analyses with and without the stunted plants. We obtained very  
184 similar results both times and thus decided to include the stunted plants in all analyses. We observed  
185 thrips on most plants at the end of the experiment, even on many control plants. However, we are  
186 not very concerned about this contamination since the relative amount of damage is representative  
187 of our desired levels of infestation. For example, control plants had very little damage compared  
188 to what was observed on the treatment plants. For the plants inoculated with five thrips, the total  
189 THC level was of 17.6% for the normal substrate and 17.77% for the biostimulant substrate. For  
190 the zero thrips treatment, the total THC level was 19.34% for the normal substrate and 19.62% for  
191 the biostimulant substrate. We limited our THC measurements to those four samples and thus

192 cannot provide statistics here. Those THC levels nevertheless indicate a possible reduction in THC  
193 when plants are under high infestation of thrips.

194 The number of thrips had a significant effect on the final yield of the cannabis plants (ANOVA  
195  $F(2, 51) = 7.1062$ ,  $P = 0,0019$ ; Fig. 1). Specifically, the yields were lower for plants that were  
196 initially inoculated with five thrips compare to the plants that had no thrips ( $t(51) = -2.569502$ ,  
197  $P = 0.0132$ ). Average yield was 30.68% higher for plants that were not inoculated with thrips  
198 (130.15 g per plant compared to 90.22 g). This result highlights the relevance of keeping stunted  
199 plants in the analysis. Indeed, as the prevalence of stunted plants was slightly higher in the control  
200 and low infestation treatment, the effect of including these low yielding plants in the models was  
201 to reduce the potential negative impact of thrips. As we found an opposite trend, it therefore  
202 reinforces the hypothesis that thrips negatively impact yields. The effect of the substrate type was  
203 not significant (ANOVA  $F(1, 51) = 3.5769$ ,  $P = 0.0643$ ; Fig. 2) while the interaction between the  
204 infestation level and the substrate type (ANOVA  $F(2, 51) = 0.0506$ ,  $P = 0.9507$ ) had no effect on  
205 the final yields.

## 206 DISCUSSION

207 In this preliminary article, we report the first quantification of yield loss from damage caused by  
208 onion thrips for indoor grown cannabis. We estimated yield losses that are higher than those  
209 reported for outdoor cannabis growers in California in a survey on all pests (Wilson et al., 2019).  
210 Indoor growing environments are particularly favourable for thrips and, thus, likely increase the  
211 risk associated with thrips' outbreaks. A similar study using three initial infestation levels of thrips  
212 found that the western flower thrips (*F. occidentalis* (Pergande)) can significantly reduce yields for  
213 greenhouse grown cucumbers, as well as the plant's growth and photosynthesis rates (Hao et al.,

214 2002). A multitude of factors such as the crop nutritional status, its growing condition and the  
215 prevalence of pests and diseases influence yields in a crop and thus make describing yields as a  
216 function of a precise pest infestation very difficult (Pereira et al., 2017). This is even more true for  
217 pests inflicting indirect damage such as thrips (Hao et al., 2002; Pereira et al., 2017). However, as  
218 growing conditions are highly controlled in indoor cannabis production, as they were standardized  
219 in between our plants, as climatic variations are minimal, and as our plants were all clones equally  
220 treated, we believe the differences observed in this study are most likely due to differences in  
221 infestations rates.

222 The onion thrips have a very diversified range of hosts (Diaz-Montano et al., 2011; Nault, Kain,  
223 & Wang, 2014; Stuart et al., 2011) and has long been recognized as a greenhouse pest (Morison,  
224 1957). Considering it has been found on hemp (Cranshaw et al., 2019), it is not surprising that  
225 indoor grown cannabis can be added to this long list of hosts. Nonetheless, this is a new piece of  
226 valuable information for producers. In onions, it can notably impair bulb weight (Ghosheh & Al-  
227 Shannag, 2000) and reduce yields, sometime by more than 50% (Diaz-Montano et al., 2011;  
228 Fournier, Boivin, & Stewart, 1995), especially since as little as 10 thrips per plant is sufficient to  
229 decrease yields by 7% in greenhouses (Kendall & Capinera, 1987). Onion thrips are particularly  
230 known to feed on leaves, causing photosynthesis reduction, distorted plant parts, and reduced bulbs  
231 size as well as transmitting viruses, such as the Iris yellow spot virus (family Bunyaviridae, genus  
232 *Tospovirus*, IYSV) (Diaz-Montano et al., 2011; Gent et al., 2006; Wu et al., 2013). Damage  
233 consisting of yellow dot-shaped scars were observed both on the leaves of our experimental plants  
234 and on production plants under outbreak pressure (Fig. 3). These injuries can be considered indirect  
235 damage and were almost certainly inflicted by the onion thrips. We believe our observations  
236 correspond to the “serious foliage damage” reported by Cranshaw et al. (2019) on hemp. Even

237 though we did not investigate damage extent or photosynthetic rate in our cannabis plants, it can  
238 be expected that our reduced yields originate from those indirect feeding damage. Similar injuries  
239 and scars are known to reduce the photosynthetic ability of leaves in onions (Diaz-Montano et al.,  
240 2011). Little information is available about the transmission of viruses to cannabis plants by thrips  
241 but McPartland (1996b) mention that viruses can greatly reduce yields in cannabis and that the  
242 onion thrips is one of the worst vector of viruses in this crop. Besides yield losses, we also highlight  
243 potential decreases in product value through reduced levels of total THC from highly infested  
244 plants.

245 The use of a growing medium with *B. pumilus* did not improved the plants' strength. It is  
246 consistent with previous experiments with the same enhanced growing medium on the control of  
247 the western flower thrips (*F. occidentalis*) (Gravel & Naasz, 2019). However, our results were  
248 nearly significant, and we still consider that growing medium enhanced with microbial  
249 biostimulants represents a promising avenue for integrated pest management in greenhouse or  
250 indoor productions. Their use should be investigated more in indoor cannabis production and for  
251 various pests.

252 In conclusion, we showed that the onion thrips is present in indoor grown cannabis in Canada  
253 and that it represents an economic threat. We observed damage caused by thrips feeding on leaves  
254 and experimentally found a link between infestation levels and final fresh yields, in addition to a  
255 possible reduction of total THC levels under high infestation. This study was preliminary and  
256 should motivate further experiments. As chemical means of control are very limited for indoor  
257 grown cannabis, we recommend strict monitoring programs for indoor cannabis producers to avoid  
258 economic losses. We show that thrips potentially represent a major threat to product quality and

259 yields. In this way, we suggest more research on cannabis pests to identify all pest species in various  
260 growing setting, including the range of damage they can cause and their economic thresholds. Only  
261 this can subsequently lead to the development of management programs and the development of  
262 safe and affordable control methods.

## 263 ACKNOWLEDGMENTS

264 We thank the team from GreenSeal Cannabis Co., especially Kurt Fisher for providing plant care,  
265 and Chris Murray and Peter Reeves for helping build the cages. We are also grateful to Premier  
266 Tech for providing the Pro-Mix HP Biostimulant + Mycorrhizae. This research was supported by  
267 funding from the NSERC's Engage Grants for Universities program, no 536612-2018.

## 268 REFERENCES

- 269 Britt, K. E., Pagani, M. K., & Kuhar, T. P. (2019). First report of brown marmorated stink bug (Hemiptera:  
270 Pentatomidae) associated with *Cannabis sativa* (Rosales: Cannabaceae) in the United States. *Journal of*  
271 *Integrated Pest Management*, 10(1), 3. doi:10.1093/jipm/pmz014
- 272 Calvo, P., Nelson, L., & Kloepper, J. (2014). Agricultural uses of plant biostimulants. *Plant and Soil*, 383(1), 3-41.  
273 doi:10.1007/s11104-014-2131-8
- 274 Conant, R., Walsh, R., Walsh, M., Bell, C., & Wallenstein, M. J. J. H. F. (2017). Effects of a microbial biostimulant,  
275 Mammoth PTM, on *Cannabis sativa* bud yield. *Journal of Horticulture*, 4, 2376-0354.1000191.
- 276 Cranshaw, W., Schreiner, M., Britt, K., Kuhar, T. P., McPartland, J., & Grant, J. (2019). Developing insect pest  
277 management systems for hemp in the United States: A work in progress. *Journal of Integrated Pest*  
278 *Management*, 10(1), 11. doi:10.1093/jipm/pmz023
- 279 de-Bashan, L. E., Hernandez, J.-P., Bashan, Y., & Maier, R. M. (2010). *Bacillus pumilus* ES4: Candidate plant growth-  
280 promoting bacterium to enhance establishment of plants in mine tailings. *Environmental and Experimental*  
281 *Botany*, 69(3), 343-352. doi:10.1016/j.envexpbot.2010.04.014
- 282 Dewey, L. H. (1913). Hemp. In *Yearbook of the United States Department of Agriculture* (pp. 283-346). Washington,  
283 D. C.
- 284 Diaz-Montano, J., Fuchs, M., Nault, B. A., Fail, J., & Shelton, A. M. (2011). Onion thrips (Thysanoptera: Thripidae):  
285 a global pest of increasing concern in onion. *Journal of economic entomology*, 104(1), 1.  
286 doi:10.1603/EC10269
- 287 Eaves, J., Eaves, S., Morphy, C., & Murray, C. (2020). The relationship between light intensity, cannabis yields, and  
288 profitability. *Agronomy Journal*, 112(2), 1466-1470. doi:10.1002/agj2.20008
- 289 Fournier, F., Boivin, G., & Stewart, R. K. (1995). Effect of *Thrips tabaci* (Thysanoptera, Thripidae) on yellow onion  
290 yields and economic thresholds for its management. *Journal of economic entomology*, 88(5), 1401-1407.  
291 doi:10.1093/jee/88.5.1401
- 292 Gent, D., Du Toit, L., Fichtner, S., Mohan, S., Pappu, H., & Schwartz, H. (2006). Iris yellow spot virus: An emerging  
293 threat to onion bulb and seed production. *PLANT DISEASE*, 90(12), 1468-1480. doi:10.1094/PD-90-1468
- 294 German, T. L., Ullman, D. E., & Moyer, J. W. (1992). Tospoviruses: diagnosis, molecular biology, phylogeny, and  
295 vector relationships. *Annual review of phytopathology*, 30, 315.

- 296 Ghosheh, H. Z., & Al-Shannag, H. K. (2000). Influence of weeds and onion thrips, *Thrips tabaci* (Thysanoptera :  
297 Thripidae), on onion bulb yield in Jordan. *Crop Protection*, 19(3), 175-179. doi:10.1016/s0261-  
298 2194(99)00084-8
- 299 Gravel, A., & Naasz, R. (2019). Development of new insect suppression solutions for greenhouse production. *Acta*  
300 *Horticulturae*, 1266(1266), 121-128. doi:10.17660/ActaHortic.2019.1266.17
- 301 Gutiérrez-Mañero, F. J., Ramos-Solano, B., Probanza, A. N., Mehrouachi, J., R. Tadeo, F., & Talon, M. (2001). The  
302 plant-growth-promoting rhizobacteria *Bacillus pumilus* and *Bacillus licheniformis* produce high amounts of  
303 physiologically active gibberellins. *Physiologia Plantarum*, 111(2), 206-211. doi:10.1034/j.1399-  
304 3054.2001.1110211.x
- 305 Hao, X., Shipp, J. L., Wang, K., Papadopoulos, A. P., & Binns, M. R. (2002). Impact of western flower thrips on  
306 growth, photosynthesis and productivity of greenhouse cucumber. *Scientia Horticulturae*, 92(3-4), 187-203.  
307 doi:10.1016/s0304-4238(01)00301-6
- 308 Kendall, D. M., & Capinera, J. L. (1987). Susceptibility of onion growth stages to onion thrips (Thysanoptera:  
309 Thripidae) damage and mechanical defoliation. *Environmental Entomology*, 16(4), 859-863.  
310 doi:10.1093/ee/16.4.859
- 311 Kim, J., & Je, Y. (2010). A novel biopesticide production: attagel-mediated precipitation of chitinase from *Beauveria*  
312 *bassiana* SFB-205 supernatant for thermotolerance. *Applied Microbiology and Biotechnology*, 87(5), 1639-  
313 1648. doi:10.1007/s00253-010-2543-1
- 314 Lago, P. K., & Stanford, D. F. (1989). Phytophagous insects associated with cultivated marijuana, *Cannabis sativa*, in  
315 Northern Mississippi. *Journal of Entomological Science*, 24(4), 437-445. doi:10.18474/0749-8004-24.4.437
- 316 Lagos-Kutz, D., Potter, B., DiFonzo, C., Russell, H., & Hartman, G. L. (2018). Two aphid species, *Phorodon cannabis*  
317 and *Rhopalosiphum rufiabdominale*, identified as potential pests on industrial hemp, *Cannabis sativa* L., in  
318 the US Midwest. *Crop Forage & Turfgrass Management*, 4(1), 3. doi:10.2134/cftm2018.04.0032
- 319 Laribi-Habchi, H. (2014). Effectiveness of a biological insecticide derived from scorpion fish offal against the chickpea  
320 weevil. *Journal of Bioprocessing & Biotechniques*, 04(02). doi:10.4172/2155-9821.1000148
- 321 McPartland, J. M. (1996a). Cannabis pests. *Journal of the International Hemp Association*, 3(2), 49, 52-55.
- 322 McPartland, J. M. (1996b). A review of Cannabis diseases. *Journal of the International Hemp Association*, 3(1), 19-  
323 23.
- 324 Morison, G. D. (1957). A review of British glasshouse Thysanoptera. *Transactions of the Royal Entomological Society*  
325 *of London*, 109(16), 467-520. doi:10.1111/j.1365-2311.1957.tb00334.x
- 326 Nault, B. A., Kain, W. C., & Wang, P. (2014). Seasonal changes in *Thrips tabaci* population structure in two cultivated  
327 hosts. *PLoS ONE*, 9(7). doi:10.1371/journal.pone.0101791
- 328 Palmer, J. M., Mound, L. A., Du Heaume, G. J., & Betts, C. (1989). *CIE guides to insects of importance to man. 2.*  
329 *Thysanoptera*: CAB, International Institute of Entomology.
- 330 Pereira, P. S., Sarmiento, R. A., Galdino, T. V. S., Lima, C. H. O., dos Santos, F. A., Silva, J., . . . Picanco, M. C.  
331 (2017). Economic injury levels and sequential sampling plans for *Frankliniella schultzei* in watermelon crops.  
332 *Pest Management Science*, 73(7), 1438-1445. doi:10.1002/ps.4475
- 333 Pérez-García, A., Romero, D., & de Vicente, A. (2011). Plant protection and growth stimulation by microorganisms:  
334 biotechnological applications of Bacilli in agriculture. *Current Opinion in Biotechnology*, 22(2), 187-193.  
335 doi:10.1016/j.copbio.2010.12.003
- 336 Pinheiro, J., Bates, D., DebRoy, S., Sarkar, D., & R Core Team. (2019). *nlme: Linear and nonlinear mixed effects*  
337 *models*. R package version 3.1-140. Retrieved from <https://CRAN.R-project.org/package=nlme>
- 338 Probanza, A., Lucas, J., Acero, N., & Gutierrez Mañero, F. (1996). The influence of native rhizobacteria on european  
339 alder (*Alnus glutinosa* (L.) Gaertn.) growth. *Plant and Soil*, 182(1), 59-66. doi:10.1007/BF00010995
- 340 R Core Team. (2019). R: A language and environment for statistical computing. Vienna, Austria. Retrieved from  
341 <https://www.R-project.org/>
- 342 Rishad, K. S., Rebello, S., Shabanamol, P. S., & Jisha, M. S. (2017). Biocontrol potential of halotolerant bacterial  
343 chitinase from high yielding novel *Bacillus Pumilus* MCB-7 autochthonous to mangrove ecosystem. *Pesticide*  
344 *Biochemistry and Physiology*, 137, 36-41. doi:10.1016/j.pestbp.2016.09.005
- 345 Shipp, J. L., Hao, X., Papadopoulos, A. P., & Binns, M. R. (1998). Impact of western flower thrips (Thysanoptera:  
346 Thripidae) on growth, photosynthesis and productivity of greenhouse sweet pepper. *Scientia Horticulturae*,  
347 72(2), 87-102. doi:10.1016/S0304-4238(97)00130-1
- 348 Stuart, R. R., Gao, Y.-L., & Lei, Z.-R. (2011). Thrips: Pests of concern to China and the United States. *Agricultural*  
349 *Sciences in China*, 10(6), 867-892. doi:10.1016/S1671-2927(11)60073-4

- 350 Torres-Vila, L. M., Rodríguez-Molina, M. C., & Lacasa-Plasencia, A. (2003). Impact of *Helicoverpa armigera* larval  
351 density and crop phenology on yield and quality losses in processing tomato: developing fruit count-based  
352 damage thresholds for IPM decision-making. *Crop Protection*, 22(3), 521-532. doi:10.1016/S0261-  
353 2194(02)00205-3
- 354 Tozlu, E., Dadasoglu, F., Kotan, R., & Tozlu, G. (2011). Insecticidal effect of some bacteria on *Bruchus dentipes* Baudi  
355 (Coleoptera: Bruchidae). *FRESENIUS ENVIRONMENTAL BULLETIN*, 20(4), 918-923.
- 356 Wilson, H., Bodwitch, H., Carah, J., Daane, K., Getz, C., Grantham, T. E., & Van, B. (2019). First known survey of  
357 cannabis production practices in California. *California Agriculture*, 73(3-4), 119-127.  
358 doi:10.3733/ca.2019a0015
- 359 Wu, S., Gao, Y., Xu, X., Zhang, Y., Wang, J., Lei, Z., & Smagghe, G. (2013). Laboratory and greenhouse evaluation  
360 of a new entomopathogenic strain of *Beauveria bassiana* for control of the onion thrips *Thrips tabaci*.  
361 *Biocontrol Science and Technology*, 23(7), 794-802. doi:10.1080/09583157.2013.794896
- 362 Yakhin, O. I., Lubyantsev, A. A., Yakhin, I., & Brown, P. (2017). Biostimulants in plant science: A global perspective.  
363 *Frontiers in Plant Science*, 7. doi:10.3389/fpls.2016.02049

364



365

## LEGENDS OF FIGURES

366 Fig. 1 Mean final fresh yields of the cannabis plants after eight weeks according to the  
367 number of inoculated onion thrips (*Thrips tabaci*). Error bars represent 95% confidence intervals.

368 Fig. 2 Mean final fresh yields of the cannabis plants after eight weeks according to the  
369 substrate type used (normal or with *Bacillus pumilus* biostimulant). Error bars represent 95%  
370 confidence intervals.

371 Fig. 3 Example of leaf damage observed on the experimental plants and on production  
372 plants in the facility.

373

374

**RUNNING TITLE:**

375 Onion thrips in cannabis

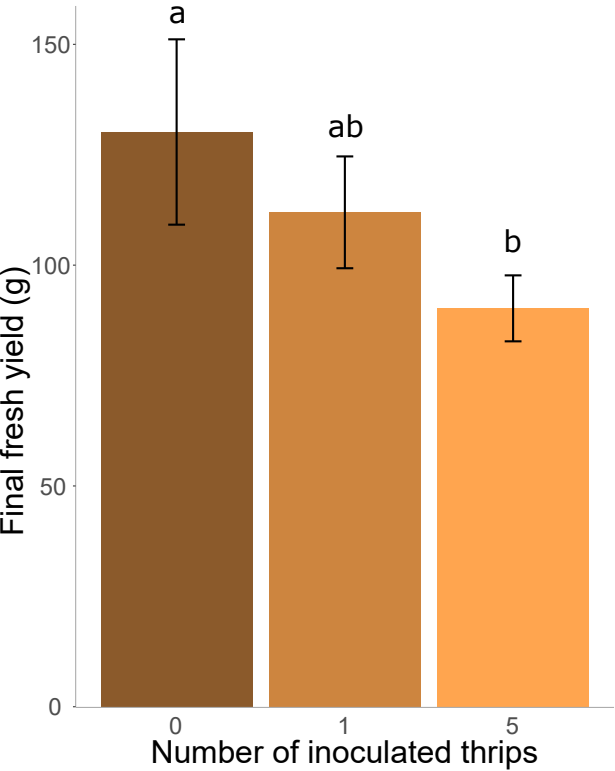

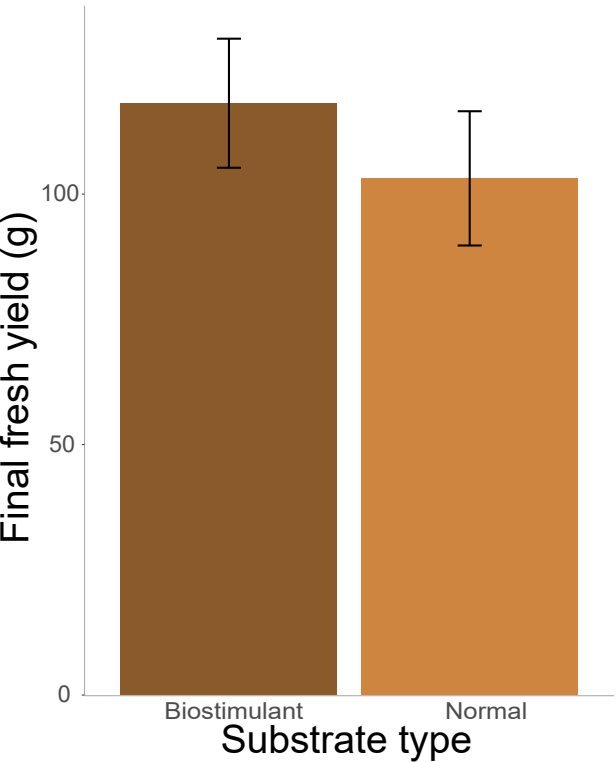

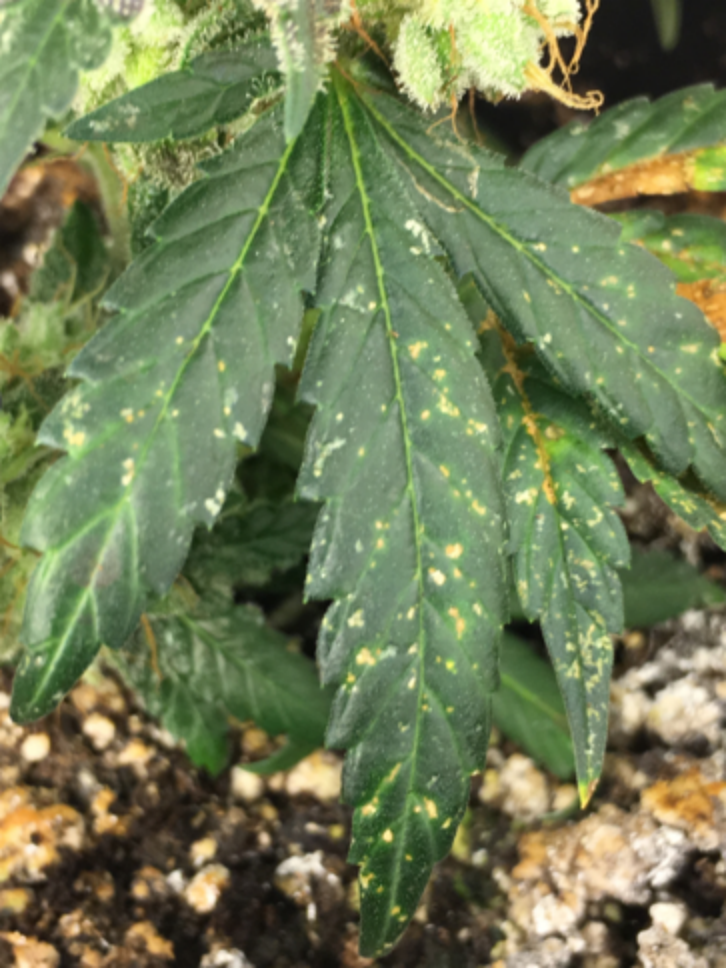

Source: https://www.biorxiv.org/content/10.1101/2020.05.11.088997v2.full.pdf
